# Supplementary material for: Low Levels of Circulating Adiponectin Are Associated with Multiple Myeloma Risk in Overweight and Obese Individuals
Source: Oxford University Press journal article supplement (doi:10.1158/0008-5472.can-15-2406), 2016-02-26
Supplement: 00085472can152406-sup-154874_1_supp_0_f1qfbs.docx [file 00085472can152406-sup-154874_1_supp_0_f1qfbs.docx]

**Table S2. Circulating levels of high-molecular-weight adiponectin and risk of multiple myelomaa**

|  |  |  | **Quartileb** | | | |  |  |
| --- | --- | --- | --- | --- | --- | --- | --- | --- |
|  | **Cases** | **Controls** | **Q1** | **Q2** | **Q3** | **Q4** | ***P*trend** | ***P*intc** |
| Overall |  |  |  |  |  |  |  |  |
| Replication setd | 450 | 898 | 1.0 (ref) | 0.73 (0.53-1.00) | 0.77 (0.56-1.06) | 0.64 (0.45-0.90) | 0.022 |  |
| Combined sete | 624 | 1,246 | 1.0 (ref) | 0.79 (0.61-1.04) | 0.73 (0.56-0.96) | 0.60 (0.45-0.81) | 0.001 |  |
|  |  |  |  |  |  |  |  |  |
| By sex |  |  |  |  |  |  |  |  |
| Female | 355 | 708 | 1.0 (ref) | 0.69 (0.48-0.98) | 0.67 (0.47-0.97) | 0.60 (0.40-0.89) | 0.021 |  |
| Male | 269 | 538 | 1.0 (ref) | 0.95 (0.63-1.43) | 0.81 (0.55-1.21) | 0.61 (0.40-0.94) | 0.017 | 0.62 |
|  |  |  |  |  |  |  |  |  |
| By time to MM diagnosis | |  |  |  |  |  |  |  |
| <6 years | 282 | 562 | 1.0 (ref) | 0.61 (0.41-0.92) | 0.58 (0.38-0.87) | 0.57 (0.37-0.88) | 0.022 |  |
| ≥6 years | 342 | 678 | 1.0 (ref) | 0.97 (0.68-1.38) | 0.87 (0.61-1.24) | 0.61 (0.41-0.92) | 0.015 | 0.24 |
|  |  |  |  |  |  |  |  |  |
| By BMI at blood drawf | |  |  |  |  |  |  |  |
| <25 kg/m2 | 212 | 463 | 1.0 (ref) | 1.10 (0.64-1.88) | 1.07 (0.65-1.76) | 1.12 (0.68-1.83) | 0.71 |  |
| 25-29.9 kg/m2 | 270 | 492 | 1.0 (ref) | 0.69 (0.46-1.03) | 0.58 (0.38-0.89) | 0.43 (0.27-0.68) | <0.001 |  |
| ≥30 kg/m2 | 136 | 277 | 1.0 (ref) | 0.65 (0.39-1.10) | 0.71 (0.39-1.28) | 0.37 (0.16-0.85) | 0.021 | 0.14 |
|  |  |  |  |  |  |  |  |  |
| By age at blood draw | |  |  |  |  |  |  |  |
| <65 years | 314 | 623 | 1.0 (ref) | 0.87 (0.60-1.25) | 0.94 (0.64-1.37) | 0.59 (0.38-0.92) | 0.036 |  |
| ≥65 years | 310 | 617 | 1.0 (ref) | 0.71 (0.48-1.06) | 0.58 (0.40-0.85) | 0.58 (0.39-0.87) | 0.009 | 0.28 |
|  |  |  |  |  |  |  |  |  |

Notes: BMI, body mass index

a Based on conditional logistic regression models unless otherwise noted

b Quartile cut points were defined based on the distribution of cohort- and sex-adjusted high-molecular-weight adiponectin levels among controls

c Tests of multiplicative interaction were based on the same models as those used for the stratified analyses and were performed using likelihood ratio tests comparing models with and without the interaction terms.

d Excluding PLCO

e Including PLCO

f Based on unconditional logistic regression models adjusted for cohort, sex, age, race, and fasting status.
